# Supplementary material
Source: PubMed Central journal article supplement (PMC4815763)
Supplement: 13280_2015_722_MOESM1_ESM.pdf [file 13280_2015_722_MOESM1_ESM.pdf]

***Ambio***

Electronic Supplementary Material

*This supplementary material has not been peer reviewed*

**Title: Sustainable farming practices of the Chinese mitten crab (*Eriocheir sinensis*) around Hongze Lake, lower Yangtze River Basin, China**

Authors: Qidong Wang, Jiashou Liu, Shengyu Zhang, Yuxi Lian, Huaiyu Ding, Xue Du, Zhongjie Li, Sena S. De Silva

## Chinese mitten crab farming practices investigation around Lake

### Hongze

### Questionnaire

|                      |  |
|----------------------|--|
| Name of farmer       |  |
| Village              |  |
| County               |  |
| Date of interview    |  |
| Name of Interviewers |  |

| Chinese mitten crab farming investigation around Lake Hongze |                              |                             |                                    |                                |                                        |
|--------------------------------------------------------------|------------------------------|-----------------------------|------------------------------------|--------------------------------|----------------------------------------|
| Farm No.                                                     | N:                           | E:                          | Pond No.                           |                                |                                        |
| <b>1. Details in Culture System</b>                          |                              |                             |                                    |                                |                                        |
| Pond size /Water surface area (ha)                           | Concrete slope               |                             | Vegetation on bank                 |                                |                                        |
|                                                              | Yes <input type="checkbox"/> | No <input type="checkbox"/> | Yes <input type="checkbox"/>       | No <input type="checkbox"/>    |                                        |
| Pond Depth(m)                                                | Culture experience (yr)      | Age of pond (yr)            | Sediment Type                      |                                |                                        |
|                                                              |                              |                             |                                    |                                |                                        |
| Fixed labor/gender (M/F)                                     | Employee (M/F)               | Land use type before        |                                    |                                |                                        |
| Male                                                         | Female                       |                             | Fish pond <input type="checkbox"/> | Paddy <input type="checkbox"/> | New reclaimed <input type="checkbox"/> |
| <b>2. Pond Preparation Methods</b>                           |                              |                             |                                    |                                |                                        |
| Comments:                                                    |                              |                             |                                    |                                |                                        |
| <b>3. Details in Stocking</b>                                |                              |                             |                                    |                                |                                        |
| Crab                                                         | Date                         | Size (g/ind.)               | Density (inds./ha)                 | Total weight (kg)              |                                        |
|                                                              |                              |                             |                                    |                                |                                        |
| Co-cultured fish                                             | Density (inds./ha)           |                             | Size (g/ind.)                      | Total weight (kg)              |                                        |
| Mandarin fish                                                |                              |                             |                                    |                                |                                        |
| Silver Carp                                                  |                              |                             |                                    |                                |                                        |
| Bighead carp                                                 |                              |                             |                                    |                                |                                        |
|                                                              |                              |                             |                                    |                                |                                        |
|                                                              |                              |                             |                                    |                                |                                        |
| <b>4. Treatments before stocking</b>                         |                              |                             |                                    |                                |                                        |
| Comments:                                                    |                              |                             |                                    |                                |                                        |
| <b>5. Details in Harvest</b>                                 |                              |                             |                                    |                                |                                        |
|                                                              | Capture time                 | Total Yield (kg)            | Capture size (g/ind.)              |                                |                                        |

|                                                                                            |                                |                                     |              |                                |    |                               |                                     |                                       |                                    |                                |    |    |
|--------------------------------------------------------------------------------------------|--------------------------------|-------------------------------------|--------------|--------------------------------|----|-------------------------------|-------------------------------------|---------------------------------------|------------------------------------|--------------------------------|----|----|
| Crab                                                                                       |                                |                                     |              |                                |    |                               |                                     |                                       |                                    |                                |    |    |
| Co-cultured fish                                                                           |                                |                                     |              |                                |    |                               |                                     |                                       |                                    |                                |    |    |
| <b>6. Details in Feed Types (kg)</b>                                                       |                                |                                     |              |                                |    |                               |                                     |                                       |                                    |                                |    |    |
| Trash<br>fish                                                                              | feed                           | Corn                                |              |                                |    |                               |                                     | Feeding strategy                      |                                    |                                |    |    |
|                                                                                            |                                |                                     |              |                                |    |                               |                                     | Fixed <input type="checkbox"/>        | Broadcast <input type="checkbox"/> |                                |    |    |
| Comments on Feeding rate at different stages:                                              |                                |                                     |              |                                |    |                               |                                     |                                       |                                    |                                |    |    |
| <b>7. Details in Natural Resources</b>                                                     |                                |                                     |              |                                |    |                               |                                     |                                       |                                    |                                |    |    |
| Macrophyte Transplanting Weight (kg)                                                       |                                |                                     |              |                                |    | Macrophyte Sources            |                                     |                                       |                                    |                                |    |    |
|                                                                                            |                                |                                     |              |                                |    | Lake <input type="checkbox"/> | Grass Seed <input type="checkbox"/> |                                       |                                    | Other <input type="checkbox"/> |    |    |
| Macrophyte Species (Coverage rate %)                                                       |                                |                                     |              |                                |    |                               |                                     |                                       |                                    |                                |    |    |
| <i>Elodea canadensis</i>                                                                   |                                | <i>Vallisneria natans</i>           |              | <i>Ceratophyllum demersum</i>  |    | <i>Hydrilla verticillata</i>  |                                     | <i>Myriophyllum spicatum</i>          |                                    |                                |    |    |
|                                                                                            |                                |                                     |              |                                |    |                               |                                     |                                       |                                    |                                |    |    |
| Snails Release Weight (kg)                                                                 |                                |                                     | Release Time |                                |    | Snail Sources                 |                                     |                                       |                                    |                                |    |    |
|                                                                                            |                                |                                     |              |                                |    | Lake <input type="checkbox"/> |                                     |                                       | other <input type="checkbox"/>     |                                |    |    |
| <b>8. Details in pond Water Management</b>                                                 |                                |                                     |              |                                |    |                               |                                     |                                       |                                    |                                |    |    |
| Water sources                                                                              |                                |                                     |              |                                |    |                               |                                     | Influent and effluent canal separated |                                    |                                |    |    |
| Lake <input type="checkbox"/>                                                              | Canal <input type="checkbox"/> | Underwater <input type="checkbox"/> |              | Other <input type="checkbox"/> |    | Yes <input type="checkbox"/>  |                                     |                                       | No <input type="checkbox"/>        |                                |    |    |
| Water Exchange (A. Total <i>input</i> / <i>output</i> volume: cm; B. Frequency: days/time) |                                |                                     |              |                                |    |                               |                                     |                                       |                                    |                                |    |    |
| Month                                                                                      | 1                              | 2                                   | 3            | 4                              | 5  | 6                             | 7                                   | 8                                     | 9                                  | 10                             | 11 | 12 |
| A                                                                                          | /                              | /                                   | /            | /                              | /  | /                             | /                                   | /                                     | /                                  | /                              | /  | /  |
| B                                                                                          |                                |                                     |              |                                |    |                               |                                     |                                       |                                    |                                |    |    |
| Month                                                                                      | 7                              | 8                                   | 9            | 10                             | 11 | 12                            |                                     |                                       |                                    |                                |    |    |
| A                                                                                          | /                              | /                                   | /            | /                              | /  | /                             |                                     |                                       |                                    |                                |    |    |
| B                                                                                          |                                |                                     |              |                                |    |                               |                                     |                                       |                                    |                                |    |    |
| <b>9. Water quality regulation methods</b>                                                 |                                |                                     |              |                                |    |                               |                                     |                                       |                                    |                                |    |    |
| Comments:                                                                                  |                                |                                     |              |                                |    |                               |                                     |                                       |                                    |                                |    |    |
| <b>10. Details in Water depth (m)</b>                                                      |                                |                                     |              |                                |    |                               |                                     |                                       |                                    |                                |    |    |
| 1                                                                                          | 2                              | 3                                   | 4            | 5                              | 6  | 7                             | 8                                   | 9                                     | 10                                 | 11                             | 12 |    |
|                                                                                            |                                |                                     |              |                                |    |                               |                                     |                                       |                                    |                                |    |    |
| <b>11. Details in Disease Outbreak</b>                                                     |                                |                                     |              |                                |    |                               |                                     |                                       |                                    |                                |    |    |
| 1                                                                                          | 2                              | 3                                   | 4            | 5                              | 6  | 7                             | 8                                   | 9                                     | 10                                 | 11                             | 12 |    |
|                                                                                            |                                |                                     |              |                                |    |                               |                                     |                                       |                                    |                                |    |    |
| <b>12. Details in Aquaculture Medicine Use (kg/ha)</b>                                     |                                |                                     |              |                                |    |                               |                                     |                                       |                                    |                                |    |    |
| quicklime                                                                                  | Calcium hypochlorite           |                                     |              | povidone-iodine                |    |                               | teaseed cake                        |                                       |                                    | Others                         |    |    |
|                                                                                            |                                |                                     |              |                                |    |                               |                                     |                                       |                                    |                                |    |    |
| <b>13. Details in Farming expenditure (RMB/yr)</b>                                         |                                |                                     |              |                                |    |                               |                                     |                                       |                                    |                                |    |    |

|                                                 |                 |                  |                   |
|-------------------------------------------------|-----------------|------------------|-------------------|
| Fencing                                         | Pump set        | Catchment tool   | Boats             |
|                                                 |                 |                  |                   |
| Land lease                                      | Deprecation     | Pond preparation | Crab seed         |
|                                                 |                 |                  |                   |
| Fish fingerling                                 | Macrophyte      | Snails           | Fuel/ electricity |
|                                                 |                 |                  |                   |
| Trash fish                                      | Commercial feed | Corn             | Trash fish        |
|                                                 |                 |                  |                   |
| <b>14. Details in Economic incomes (RMB/yr)</b> |                 |                  |                   |
|                                                 | Prices          | Total income     |                   |
| Mitten Crab                                     |                 |                  |                   |
| Co-cultured Fish                                |                 |                  |                   |
| <b>15. Harvesting and Marketing</b>             |                 |                  |                   |
| Comments:                                       |                 |                  |                   |
| <b>Other Comments:</b>                          |                 |                  |                   |
